# Supplementary material
Source: PubMed Central journal article supplement (PMC8311095)
Supplement: emermed-2020-210783supp002.pdf [file emermed-2020-210783supp002.pdf]

Supplementary Table S1: Sensitivity and specificity of each threshold of CURB, CRB, PMEWS and NEWS2 for predicting the primary and secondary outcomes

| Threshold      | Primary: Adverse outcome |                      | Secondary: Death without support |                      | Secondary: Any Support |                      |
|----------------|--------------------------|----------------------|----------------------------------|----------------------|------------------------|----------------------|
|                | Sensitivity (95% CI)     | Specificity (95% CI) | Sensitivity (95% CI)             | Specificity (95% CI) | Sensitivity (95% CI)   | Specificity (95% CI) |
| <b>CURB-65</b> |                          |                      |                                  |                      |                        |                      |
| >0             | 0.90 (0.89 to 0.91)      | 0.44 (0.43 to 0.45)  | 0.97 (0.96 to 0.98)              | 0.41 (0.40 to 0.42)  | 0.81 (0.79 to 0.82)    | 0.38 (0.38 to 0.39)  |
| >1             | 0.71 (0.70 to 0.72)      | 0.69 (0.69 to 0.70)  | 0.86 (0.85 to 0.87)              | 0.67 (0.66 to 0.68)  | 0.52 (0.50 to 0.54)    | 0.62 (0.61 to 0.63)  |
| >2             | 0.39 (0.38 to 0.41)      | 0.88 (0.88 to 0.89)  | 0.53 (0.51 to 0.55)              | 0.87 (0.87 to 0.88)  | 0.22 (0.20 to 0.24)    | 0.83 (0.82 to 0.83)  |
| >3             | 0.14 (0.13 to 0.15)      | 0.98 (0.97 to 0.98)  | 0.21 (0.19 to 0.23)              | 0.97 (0.97 to 0.97)  | 0.06 (0.05 to 0.07)    | 0.95 (0.95 to 0.95)  |
| >4             | 0.02 (0.02 to 0.03)      | 1.00 (1.00 to 1.00)  | 0.03 (0.03 to 0.04)              | 1.00 (1.00 to 1.00)  | 0.01 (0.00 to 0.01)    | 0.99 (0.99 to 0.99)  |
| <b>CRB-65</b>  |                          |                      |                                  |                      |                        |                      |
| >0             | 0.86 (0.85 to 0.87)      | 0.48 (0.47 to 0.48)  | 0.96 (0.95 to 0.97)              | 0.45 (0.44 to 0.46)  | 0.74 (0.72 to 0.76)    | 0.42 (0.41 to 0.42)  |
| >1             | 0.49 (0.47 to 0.50)      | 0.82 (0.81 to 0.82)  | 0.63 (0.61 to 0.65)              | 0.80 (0.80 to 0.81)  | 0.30 (0.28 to 0.32)    | 0.76 (0.75 to 0.76)  |
| >2             | 0.17 (0.16 to 0.18)      | 0.96 (0.96 to 0.97)  | 0.25 (0.23 to 0.27)              | 0.96 (0.96 to 0.96)  | 0.07 (0.06 to 0.08)    | 0.94 (0.93 to 0.94)  |
| >3             | 0.03 (0.02 to 0.03)      | 1.00 (1.00 to 1.00)  | 0.04 (0.04 to 0.05)              | 1.00 (1.00 to 1.00)  | 0.01 (0.01 to 0.01)    | 0.99 (0.99 to 0.99)  |
| <b>PMEWS</b>   |                          |                      |                                  |                      |                        |                      |
| >0             | 1.00 (1.00 to 1.00)      | 0.05 (0.05 to 0.06)  | 1.00 (1.00 to 1.00)              | 0.05 (0.05 to 0.05)  | 1.00 (1.00 to 1.00)    | 0.05 (0.04 to 0.05)  |
| >1             | 0.99 (0.99 to 0.99)      | 0.17 (0.16 to 0.17)  | 1.00 (0.99 to 1.00)              | 0.15 (0.14 to 0.15)  | 0.99 (0.98 to 0.99)    | 0.14 (0.14 to 0.15)  |
| >2             | 0.97 (0.96 to 0.97)      | 0.30 (0.30 to 0.31)  | 0.99 (0.98 to 0.99)              | 0.28 (0.27 to 0.28)  | 0.94 (0.93 to 0.95)    | 0.27 (0.26 to 0.27)  |
| >3             | 0.89 (0.88 to 0.90)      | 0.45 (0.45 to 0.46)  | 0.92 (0.91 to 0.93)              | 0.42 (0.41 to 0.43)  | 0.85 (0.84 to 0.87)    | 0.40 (0.40 to 0.41)  |
| >4             | 0.78 (0.76 to 0.79)      | 0.60 (0.59 to 0.61)  | 0.83 (0.81 to 0.84)              | 0.57 (0.56 to 0.57)  | 0.72 (0.70 to 0.74)    | 0.54 (0.54 to 0.55)  |
| >5             | 0.65 (0.64 to 0.67)      | 0.73 (0.72 to 0.74)  | 0.71 (0.69 to 0.73)              | 0.70 (0.69 to 0.70)  | 0.58 (0.56 to 0.60)    | 0.67 (0.66 to 0.68)  |
| >6             | 0.51 (0.50 to 0.53)      | 0.83 (0.82 to 0.83)  | 0.57 (0.55 to 0.59)              | 0.80 (0.79 to 0.80)  | 0.44 (0.42 to 0.46)    | 0.77 (0.77 to 0.78)  |
| >7             | 0.37 (0.36 to 0.39)      | 0.90 (0.89 to 0.90)  | 0.43 (0.41 to 0.45)              | 0.87 (0.87 to 0.88)  | 0.31 (0.29 to 0.33)    | 0.85 (0.85 to 0.86)  |
| >8             | 0.26 (0.25 to 0.27)      | 0.94 (0.94 to 0.94)  | 0.31 (0.29 to 0.33)              | 0.92 (0.92 to 0.93)  | 0.20 (0.18 to 0.21)    | 0.91 (0.90 to 0.91)  |
| >9             | 0.17 (0.16 to 0.18)      | 0.97 (0.97 to 0.97)  | 0.22 (0.21 to 0.24)              | 0.96 (0.96 to 0.96)  | 0.11 (0.10 to 0.13)    | 0.94 (0.94 to 0.95)  |
| >10            | 0.11 (0.10 to 0.12)      | 0.98 (0.98 to 0.99)  | 0.14 (0.13 to 0.16)              | 0.98 (0.98 to 0.98)  | 0.07 (0.06 to 0.08)    | 0.97 (0.96 to 0.97)  |

|              |                     |                     |                     |                     |                     |                     |
|--------------|---------------------|---------------------|---------------------|---------------------|---------------------|---------------------|
| >11          | 0.06 (0.06 to 0.07) | 0.99 (0.99 to 0.99) | 0.09 (0.08 to 0.10) | 0.99 (0.99 to 0.99) | 0.03 (0.03 to 0.04) | 0.98 (0.98 to 0.98) |
| >12          | 0.03 (0.03 to 0.04) | 1.00 (1.00 to 1.00) | 0.05 (0.04 to 0.06) | 1.00 (0.99 to 1.00) | 0.01 (0.01 to 0.02) | 0.99 (0.99 to 0.99) |
| >13          | 0.02 (0.01 to 0.02) | 1.00 (1.00 to 1.00) | 0.03 (0.02 to 0.03) | 1.00 (1.00 to 1.00) | 0.01 (0.00 to 0.01) | 1.00 (0.99 to 1.00) |
| >14          | 0.01 (0.01 to 0.01) | 1.00 (1.00 to 1.00) | 0.01 (0.01 to 0.02) | 1.00 (1.00 to 1.00) | 0.00 (0.00 to 0.01) | 1.00 (1.00 to 1.00) |
| >15          | 0.00 (0.00 to 0.00) | 1.00 (1.00 to 1.00) | 0.00 (0.00 to 0.01) | 1.00 (1.00 to 1.00) | 0.00 (0.00 to 0.00) | 1.00 (1.00 to 1.00) |
| >16          | 0.00 (0.00 to 0.00) | 1.00 (1.00 to 1.00) | 0.00 (0.00 to 0.00) | 1.00 (1.00 to 1.00) | 0.00 (0.00 to 0.00) | 1.00 (1.00 to 1.00) |
| >17          | 0.00 (0.00 to 0.00) | 1.00 (1.00 to 1.00) | 0.00 (0.00 to 0.00) | 1.00 (1.00 to 1.00) | 0.00 (0.00 to 0.00) | 1.00 (1.00 to 1.00) |
| <b>NEWS2</b> |                     |                     |                     |                     |                     |                     |
| >0           | 0.98 (0.98 to 0.99) | 0.14 (0.13 to 0.15) | 0.98 (0.98 to 0.99) | 0.13 (0.12 to 0.13) | 0.98 (0.98 to 0.99) | 0.12 (0.12 to 0.13) |
| >1           | 0.96 (0.95 to 0.96) | 0.28 (0.28 to 0.29) | 0.96 (0.95 to 0.96) | 0.26 (0.25 to 0.26) | 0.96 (0.95 to 0.96) | 0.25 (0.24 to 0.26) |
| >2           | 0.92 (0.91 to 0.93) | 0.40 (0.39 to 0.41) | 0.92 (0.91 to 0.93) | 0.37 (0.36 to 0.37) | 0.92 (0.90 to 0.93) | 0.36 (0.35 to 0.37) |
| >3           | 0.85 (0.84 to 0.86) | 0.53 (0.52 to 0.54) | 0.86 (0.84 to 0.87) | 0.49 (0.48 to 0.50) | 0.84 (0.82 to 0.86) | 0.48 (0.47 to 0.48) |
| >4           | 0.77 (0.76 to 0.78) | 0.64 (0.63 to 0.65) | 0.78 (0.76 to 0.79) | 0.60 (0.59 to 0.60) | 0.76 (0.74 to 0.78) | 0.58 (0.58 to 0.59) |
| >5           | 0.66 (0.65 to 0.68) | 0.74 (0.73 to 0.75) | 0.68 (0.66 to 0.69) | 0.70 (0.69 to 0.70) | 0.64 (0.62 to 0.67) | 0.68 (0.68 to 0.69) |
| >6           | 0.54 (0.52 to 0.55) | 0.82 (0.82 to 0.83) | 0.56 (0.54 to 0.57) | 0.78 (0.78 to 0.79) | 0.51 (0.49 to 0.54) | 0.77 (0.77 to 0.78) |
| >7           | 0.43 (0.42 to 0.45) | 0.88 (0.88 to 0.89) | 0.46 (0.44 to 0.48) | 0.85 (0.85 to 0.86) | 0.40 (0.38 to 0.42) | 0.84 (0.83 to 0.84) |
| >8           | 0.32 (0.30 to 0.33) | 0.93 (0.92 to 0.93) | 0.35 (0.33 to 0.37) | 0.91 (0.90 to 0.91) | 0.27 (0.25 to 0.29) | 0.89 (0.89 to 0.89) |
| >9           | 0.21 (0.20 to 0.23) | 0.96 (0.95 to 0.96) | 0.25 (0.23 to 0.26) | 0.94 (0.94 to 0.95) | 0.17 (0.16 to 0.19) | 0.93 (0.93 to 0.93) |
| >10          | 0.14 (0.13 to 0.15) | 0.98 (0.97 to 0.98) | 0.17 (0.16 to 0.19) | 0.97 (0.96 to 0.97) | 0.10 (0.09 to 0.12) | 0.96 (0.95 to 0.96) |
| >11          | 0.08 (0.08 to 0.09) | 0.99 (0.98 to 0.99) | 0.11 (0.10 to 0.12) | 0.98 (0.98 to 0.98) | 0.05 (0.05 to 0.07) | 0.97 (0.97 to 0.98) |
| >12          | 0.05 (0.04 to 0.06) | 0.99 (0.99 to 0.99) | 0.07 (0.06 to 0.08) | 0.99 (0.99 to 0.99) | 0.03 (0.03 to 0.04) | 0.99 (0.98 to 0.99) |
| >13          | 0.03 (0.03 to 0.04) | 1.00 (1.00 to 1.00) | 0.04 (0.03 to 0.05) | 1.00 (0.99 to 1.00) | 0.02 (0.01 to 0.03) | 0.99 (0.99 to 0.99) |
| >14          | 0.01 (0.01 to 0.02) | 1.00 (1.00 to 1.00) | 0.02 (0.01 to 0.02) | 1.00 (1.00 to 1.00) | 0.01 (0.01 to 0.01) | 1.00 (1.00 to 1.00) |
| >15          | 0.01 (0.00 to 0.01) | 1.00 (1.00 to 1.00) | 0.01 (0.01 to 0.01) | 1.00 (1.00 to 1.00) | 0.00 (0.00 to 0.01) | 1.00 (1.00 to 1.00) |
| >16          | 0.00 (0.00 to 0.00) | 1.00 (1.00 to 1.00) | 0.00 (0.00 to 0.01) | 1.00 (1.00 to 1.00) | 0.00 (0.00 to 0.00) | 1.00 (1.00 to 1.00) |
| >17          | 0.00 (0.00 to 0.00) | 1.00 (1.00 to 1.00) | 0.00 (0.00 to 0.00) | 1.00 (1.00 to 1.00) | 0.00 (0.00 to 0.00) | 1.00 (1.00 to 1.00) |
| >18          | 0.00 (0.00 to 0.00) | 1.00 (1.00 to 1.00) | 0.00 (0.00 to 0.00) | 1.00 (1.00 to 1.00) | 0.00 (0.00 to 0.00) | 1.00 (1.00 to 1.00) |
