# Supplementary material
Source: PubMed Central journal article supplement (PMC8311095)
Supplement: emermed-2020-210783supp003.pdf [file emermed-2020-210783supp003.pdf]

## Appendix 2: Study Steering Committee

| Title                      | First Name | Last Name | Job Title                                                                                                                   | Name of employing institution, and any institutions where this nominee holds an Honorary Contract | Membership Type: | Independent | Expertise                             |
|----------------------------|------------|-----------|-----------------------------------------------------------------------------------------------------------------------------|---------------------------------------------------------------------------------------------------|------------------|-------------|---------------------------------------|
| Mrs                        | Shan       | Bennett   | PPI                                                                                                                         |                                                                                                   | PPI Member       | Yes         | PPI, Sheffield Emergency Care Forum   |
| Prof (Associate Professor) | Paul       | Baxter    | Senior Lecturer in Biostatistics                                                                                            | University of Leeds. Honorary contract with Leeds Teaching Hospitals NHS Trust.                   | Member           | Yes         | Biostatistics                         |
| Prof                       | Tim        | Coats     | Professor of Emergency Medicine                                                                                             | University of Leicester                                                                           | Chair            | Yes         | Clinician Emergency Medicine Research |
| Mrs                        | Enid       | Hirst     | Co-ordinator of Sheffield Emergency Care Forum (PPI)                                                                        |                                                                                                   | PPI Member       | Yes         | PPI, Sheffield Emergency Care Forum   |
| Mrs                        | Beryl      | Darlison  | PPI                                                                                                                         |                                                                                                   | PPI Member       | Yes         | PPI, Sheffield Emergency Care Forum   |
| Dr                         | Kavin      | Smith     | Deputy Director Healthcare Public Health England, Yorkshire and the Humber (Replaced Will Morton as the PHE representative) | Public Health England                                                                             | Member           | Yes         | Public health                         |
| Dr                         | Will       | Morton    | Consultant in Health Protection at Public Health England                                                                    | Public Health England. Honorary contract with the University of Manchester.                       | Member           | Yes         | Health protection specialist          |

|      |        |            |                                                                |                                                                                                        |        |     |                                                     |
|------|--------|------------|----------------------------------------------------------------|--------------------------------------------------------------------------------------------------------|--------|-----|-----------------------------------------------------|
| Dr   | Nazir  | Lone       | Senior Clinical Lecturer in Critical Care                      | The University of Edinburgh, Honorary Consultant in Critical Care at the Royal Infirmary of Edinburgh. | Member | No  | Clinician Critical Care, Critical Care Epidemiology |
| Dr   | Graham | McClelland | Research paramedic                                             | North East Ambulance Service NHS Trust                                                                 | Member | Yes | Clinician Paramedic                                 |
| Prof | Steve  | Goodacre   | PRIEST CI                                                      | The University of Sheffield                                                                            | Member | No  | Clinician Emergency Medicine Research               |
| Mrs  | Rachel | Robinson   | Chief Nurse                                                    | Integrated Care 24 Ltd                                                                                 | Member | Yes | Clinician, 111 Knowledge                            |
| Dr   | Mathew | Beattie    | Medical Director North East Ambulance Service Foundation Trust | North East Ambulance Service Foundation Trust                                                          | Member | Yes | Clinician, North East Ambulance Service             |
