# Supplementary material
Source: PubMed Central journal article supplement (PMC8311095)
Supplement: emermed-2020-210783supp004.pdf [file emermed-2020-210783supp004.pdf]

**Appendix 3: Site Research Staff**

|                                             |                                                               |
|---------------------------------------------|---------------------------------------------------------------|
| Anna Wilson                                 | Arianna Bellini                                               |
| Bethan Holroyd-Hind                         | Chloe Lyons                                                   |
| Chris Fitzsimmons                           | Tracy Marsden                                                 |
| Julie Morcombe                              | Mr Paul Brittain                                              |
| Mrs Claire Brookes                          | Joanne Galliford                                              |
| Mrs Heidi Redfearn                          | Prisca Gondo                                                  |
| Dr Ben Bloom                                | Paula Harman                                                  |
| Imogen Skene                                | Melanie Darwent                                               |
| Raine Astin-Chamberlain                     | Ross Downes                                                   |
| Laura Barman                                | Sally Beer                                                    |
| Janine Mallison                             | Dr Jennifer Lockwood                                          |
| Lisa Baldwin                                | Harrogate Research team                                       |
| Anneli James                                | Alasdair Gray                                                 |
| Lucy Newton                                 | Polly Black                                                   |
| Mark D Lyttle                               | Amanda Lyle                                                   |
| Rebecca Hoskins                             | Yvonne Lester                                                 |
| Sally Melson                                | Dane Goodere-Bennett                                          |
| Bristol Clinical Trials Team                | Dr Huw Steven Jenkins                                         |
| Mrs Emma Storr                              | Dr John Wright                                                |
| Mr Martin Walton                            | Kimberley Webster                                             |
| Dr Felix Wood                               | Professor Richard Body                                        |
| Annie Rose RGN                              | Dr Eloise Cook                                                |
| Francesca Wright RGN                        | Non-clinical COVID-19 Research Delivery<br>Team at Manchester |
| Aarzo Khan                                  | Abdo Sattout                                                  |
| Liza Keating                                | Melanie Harrison                                              |
| Emma Craig                                  | Sarah Stevenson                                               |
| Elizabeth Taylor                            | Dr Adrian Boyle                                               |
| Andrew Rees MBA RICR                        | Susie Hardwick                                                |
| Simon Sharpe                                | Debbie Read                                                   |
| Heather Sellers                             | Frank Coffey                                                  |
| Dr Tanya de Weymarn                         | Megan Meredith                                                |
| Gloucestershire Cancer Clinical Trials Team | Helen Navarra                                                 |
| Jagtar Pooni                                | Mrs Judith Ratcliff                                           |
| Sara Simmons                                | Fiona Thompson                                                |
| Dani Steward                                | Amanda Adamson                                                |
| Dr Adrian Marsh                             | Dr Gareth Hampton                                             |
| Sr Mandy Carnahan                           | Dr Sarah Wilson                                               |
| Sr Lucy Price                               | Mrs Joana Da Rocha                                            |
| Dr Mark Harrison                            | Dr Charlotte Griffiths                                        |
| Rebecca Emmonds                             | Dr Nam Tong                                                   |
| Jane Luke                                   | Mrs Tracy Fuller                                              |
| Northumbria Clinical Trials Team            | Mrs Hannah Bloxham                                            |
| Mrs Katrina Parkinson                       | Alastair Richards                                             |
| Miss Georgia Thomasson                      | Debra Barnett                                                 |
| Mrs Alda Remegoso                           | Lindianne Aitken                                              |
| Bernard Hadebe                              |                                                               |

|                       |                                      |
|-----------------------|--------------------------------------|
| Suzannah Pegler       | Mr Craig Mower                       |
| Maggie Walton         | Sara Bennett                         |
| Tim Slade             | Judith Bell                          |
| Fleur Cantle          | Abigail Pemberton                    |
| Hannah Cotton         | Dr Jill Woodhead                     |
| Maeve Cockrell        | Sherwood Forest Clinical Trials Team |
| Jessica Law           | Dr Amber Nocher                      |
| Ava Williams          | Dr Henrietta Morton King             |
| Janet Mills           | Mrs Jo-Ann Taylor                    |
| Janice Birt           | Dr Shayma Habeeb                     |
| Cassandra Gleeson     | Wojciech Sawicki                     |
| Dr Recebba Macfarlane | Kate Martin                          |
| Mrs Lisa Evans        | Nicola Charnley                      |
| Ms Eloise Van Vuren   | Mr Matthew Edward Ryan               |
| Dr Amelia Gruber      | Dr Shrouk Messahel                   |
| Dr Ignacio Cardona    | Dr Daniel B Hawcutt                  |
| Laura O'Rourke        | Miss Laura Purandare                 |
| Julie Quigley         | Mr Daniel Griffiths                  |
| Mohammad Zubair Ahmad | Miss Rebecca Miln                    |
| Daniella Hydes        | Robert Hull                          |
| Suzanne Mason         | Laura Robertson                      |
| Mishel Cunningham     | Michaela Sutherland                  |
| Nicola Lancaster      | Bolton Clinical Trials Team          |
| Amanda Cowton         | Christine Dixon                      |
| Sarah Clark           | Ellen Jessup-Dunton                  |
| Jane Varin            | Reina Layug                          |
| Karl Ward             | Dr. Rajendar Garlapati               |
| Ella Sykes            | Farzana Masters                      |
| Heather Jarman        | Yvonne Grimes                        |
| Desislava Baramova    | Joseph Dykes                         |
| Marta Pizzorusso      | Katharine Gantert                    |
| Dr Sarah Essex        | Favour Chukwunonyerem                |
| Mrs Andrea Watson     | Dilara Arslan                        |
