# Supplementary material
Source: PubMed Central journal article supplement (PMC8311095)
Supplement: emermed-2020-210783supp006.pdf [file emermed-2020-210783supp006.pdf]

Supplementary Table S2: Proportion of patients with an adverse outcome for each level of each triage tool

| Score | CURB-65 |         | CRB-65 |         | PMEWS |         | NEWS2 score |         | NEWS2 rule |         | SFAHP-6 |         | SFAHP-7 |         | WHO   |         |
|-------|---------|---------|--------|---------|-------|---------|-------------|---------|------------|---------|---------|---------|---------|---------|-------|---------|
|       | N       | Prop AO | N      | Prop AO | N     | Prop AO | N           | Prop AO | N          | Prop AO | N       | Prop AO | N       | Prop AO | N     | Prop AO |
| 0     | 7538    | 0.06    | 8320   | 0.08    | 872   | 0       | 2331        | 0.03    | 9538       | 0.08    | 11361   | 0.1     | 8337    | 0.06    | 4624  | 0.05    |
| 1     | 5008    | 0.17    | 7224   | 0.24    | 1821  | 0.02    | 2427        | 0.05    | 11056      | 0.34    | 5309    | 0.29    | 4769    | 0.19    | 16267 | 0.27    |
| 2     | 4487    | 0.32    | 3824   | 0.38    | 2326  | 0.05    | 2095        | 0.08    |            |         | 2210    | 0.47    | 4436    | 0.33    |       |         |
| 3     | 2647    | 0.43    | 1173   | 0.55    | 2738  | 0.12    | 2389        | 0.13    |            |         | 723     | 0.62    | 2160    | 0.48    |       |         |
| 4     | 901     | 0.61    | 175    | 0.74    | 2873  | 0.18    | 2171        | 0.17    |            |         | 205     | 0.76    | 725     | 0.62    |       |         |
| 5     | 135     | 0.73    |        |         | 2606  | 0.22    | 2075        | 0.23    |            |         | 43      | 0.86    | 205     | 0.76    |       |         |
| 6     |         |         |        |         | 2204  | 0.29    | 1896        | 0.3     |            |         | 7       | 0.86    | 43      | 0.86    |       |         |
| 7     |         |         |        |         | 1702  | 0.36    | 1448        | 0.33    |            |         |         |         | 7       | 0.86    |       |         |
| 8     |         |         |        |         | 1216  | 0.43    | 1254        | 0.43    |            |         |         |         |         |         |       |         |
| 9     |         |         |        |         | 845   | 0.47    | 941         | 0.5     |            |         |         |         |         |         |       |         |
| 10    |         |         |        |         | 549   | 0.53    | 624         | 0.53    |            |         |         |         |         |         |       |         |

AO: adverse outcome
